# Supplementary material for: Differential p16 expression levels in the liver, hepatocytes and hepatocellular cell lines
Source: PeerJ journal article supplement (doi:10.7717/peerj.12358), 2021-11-02

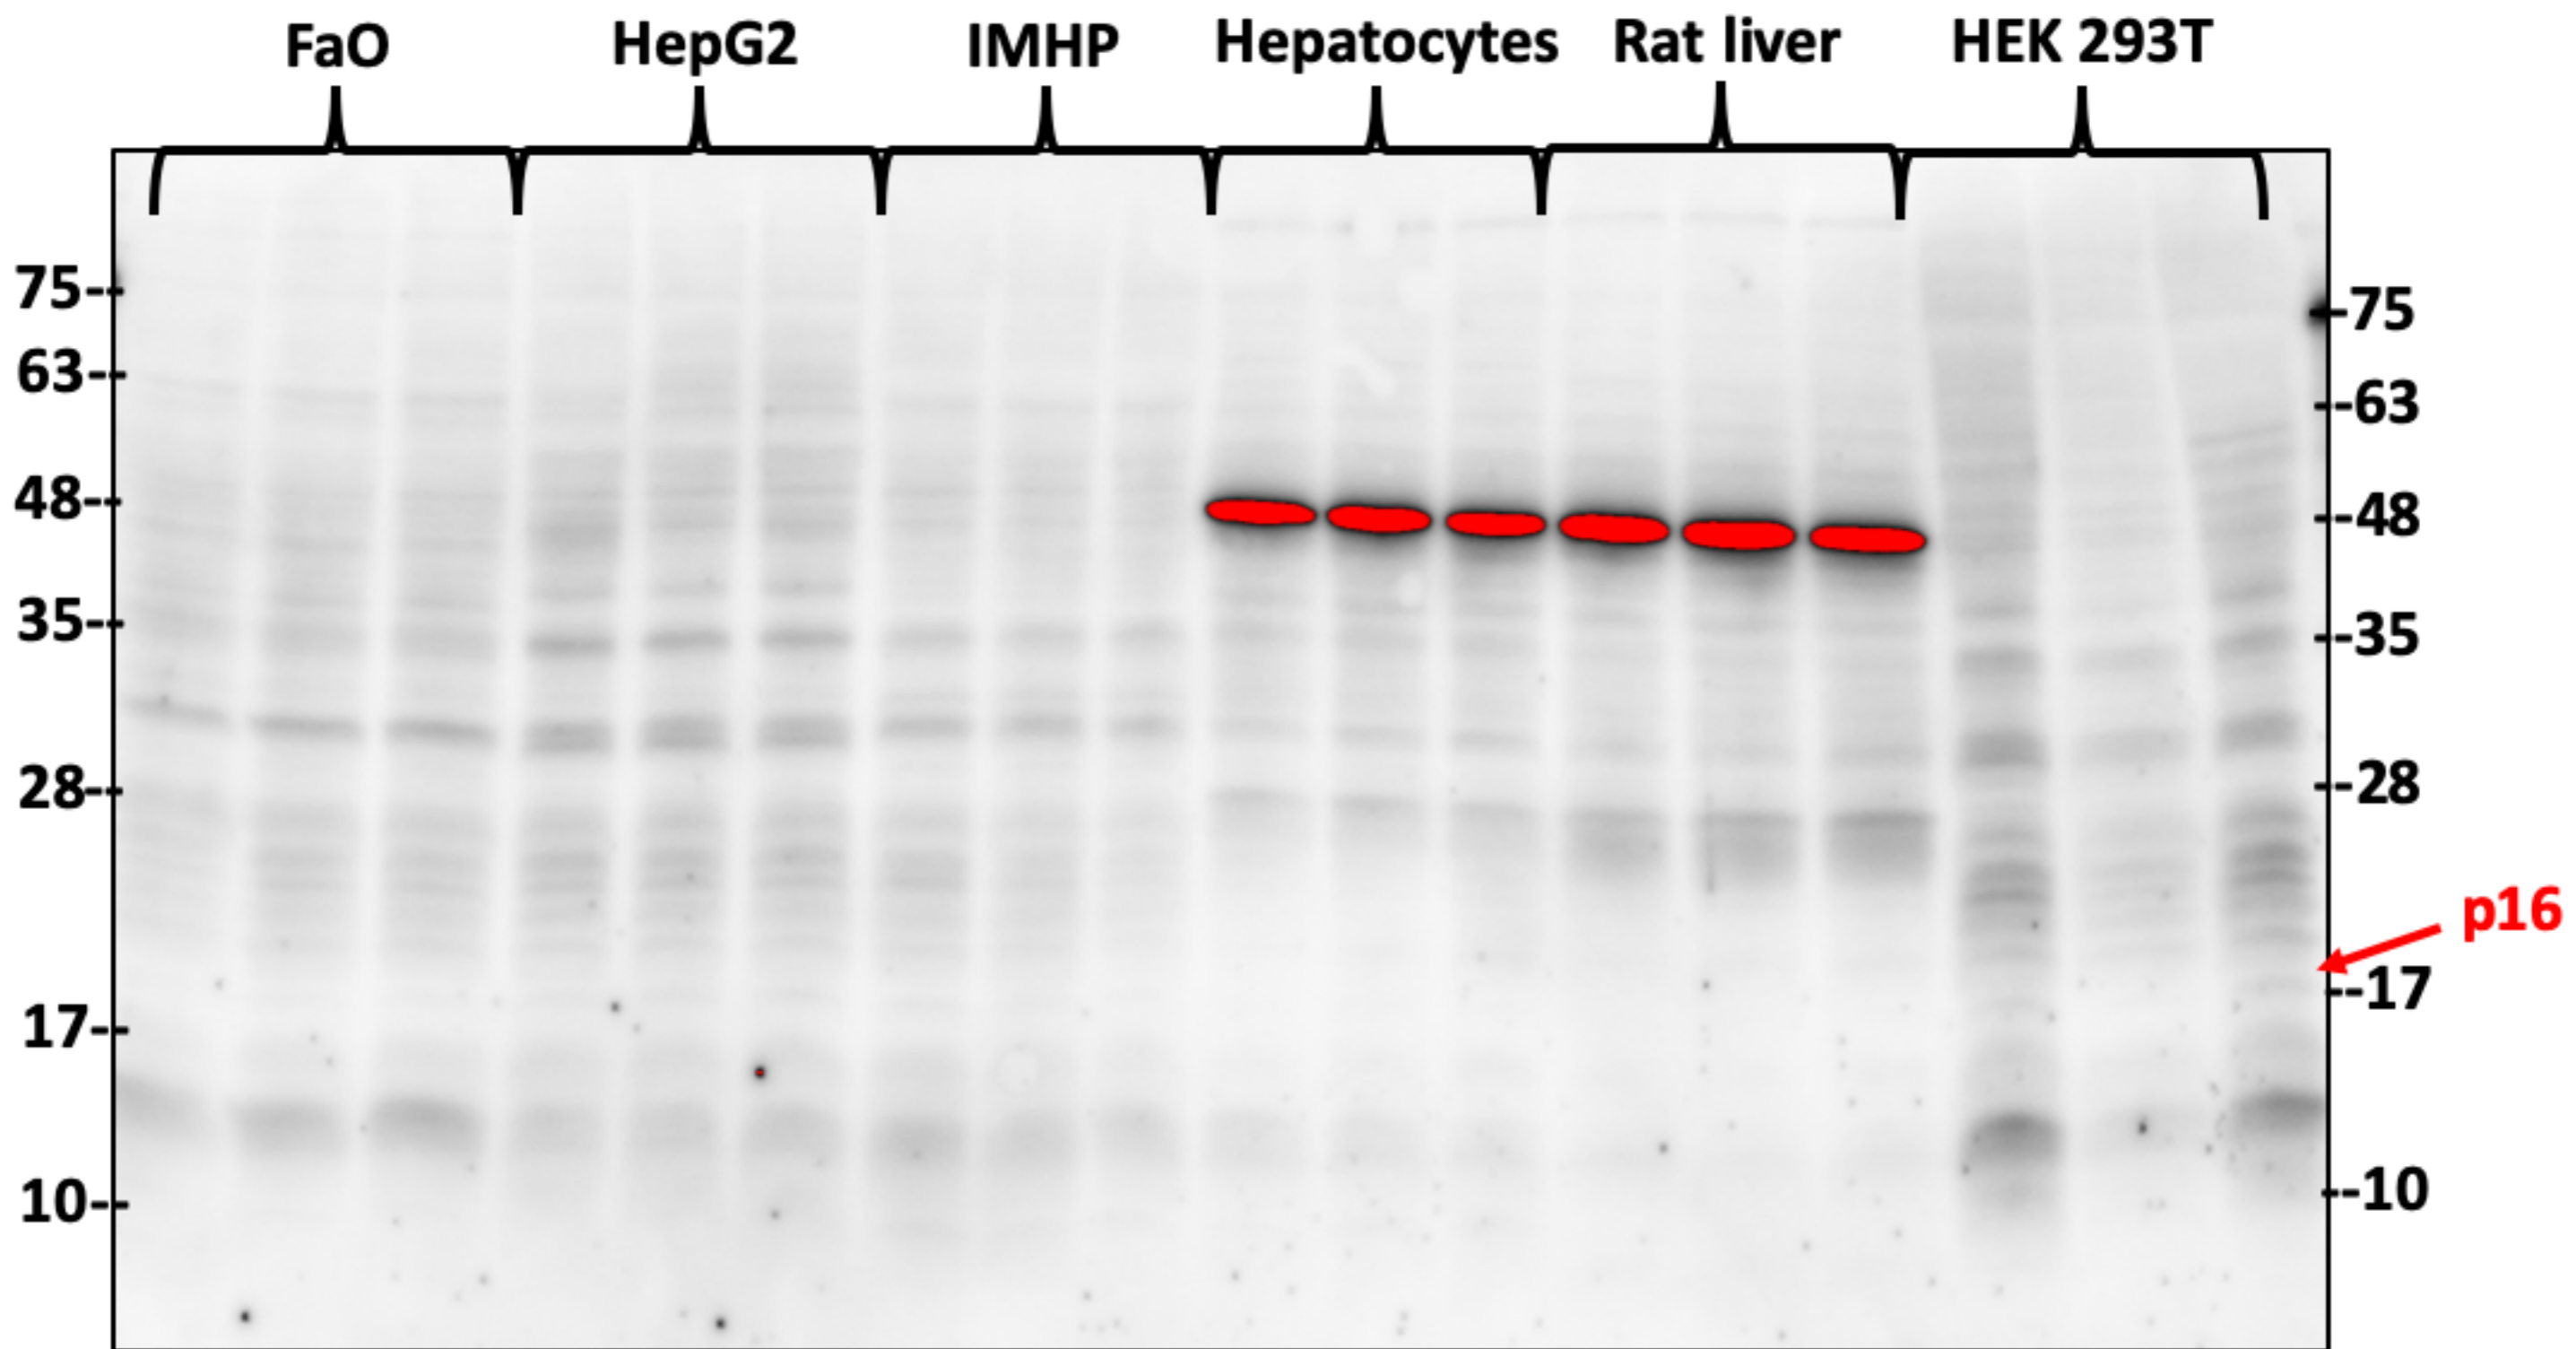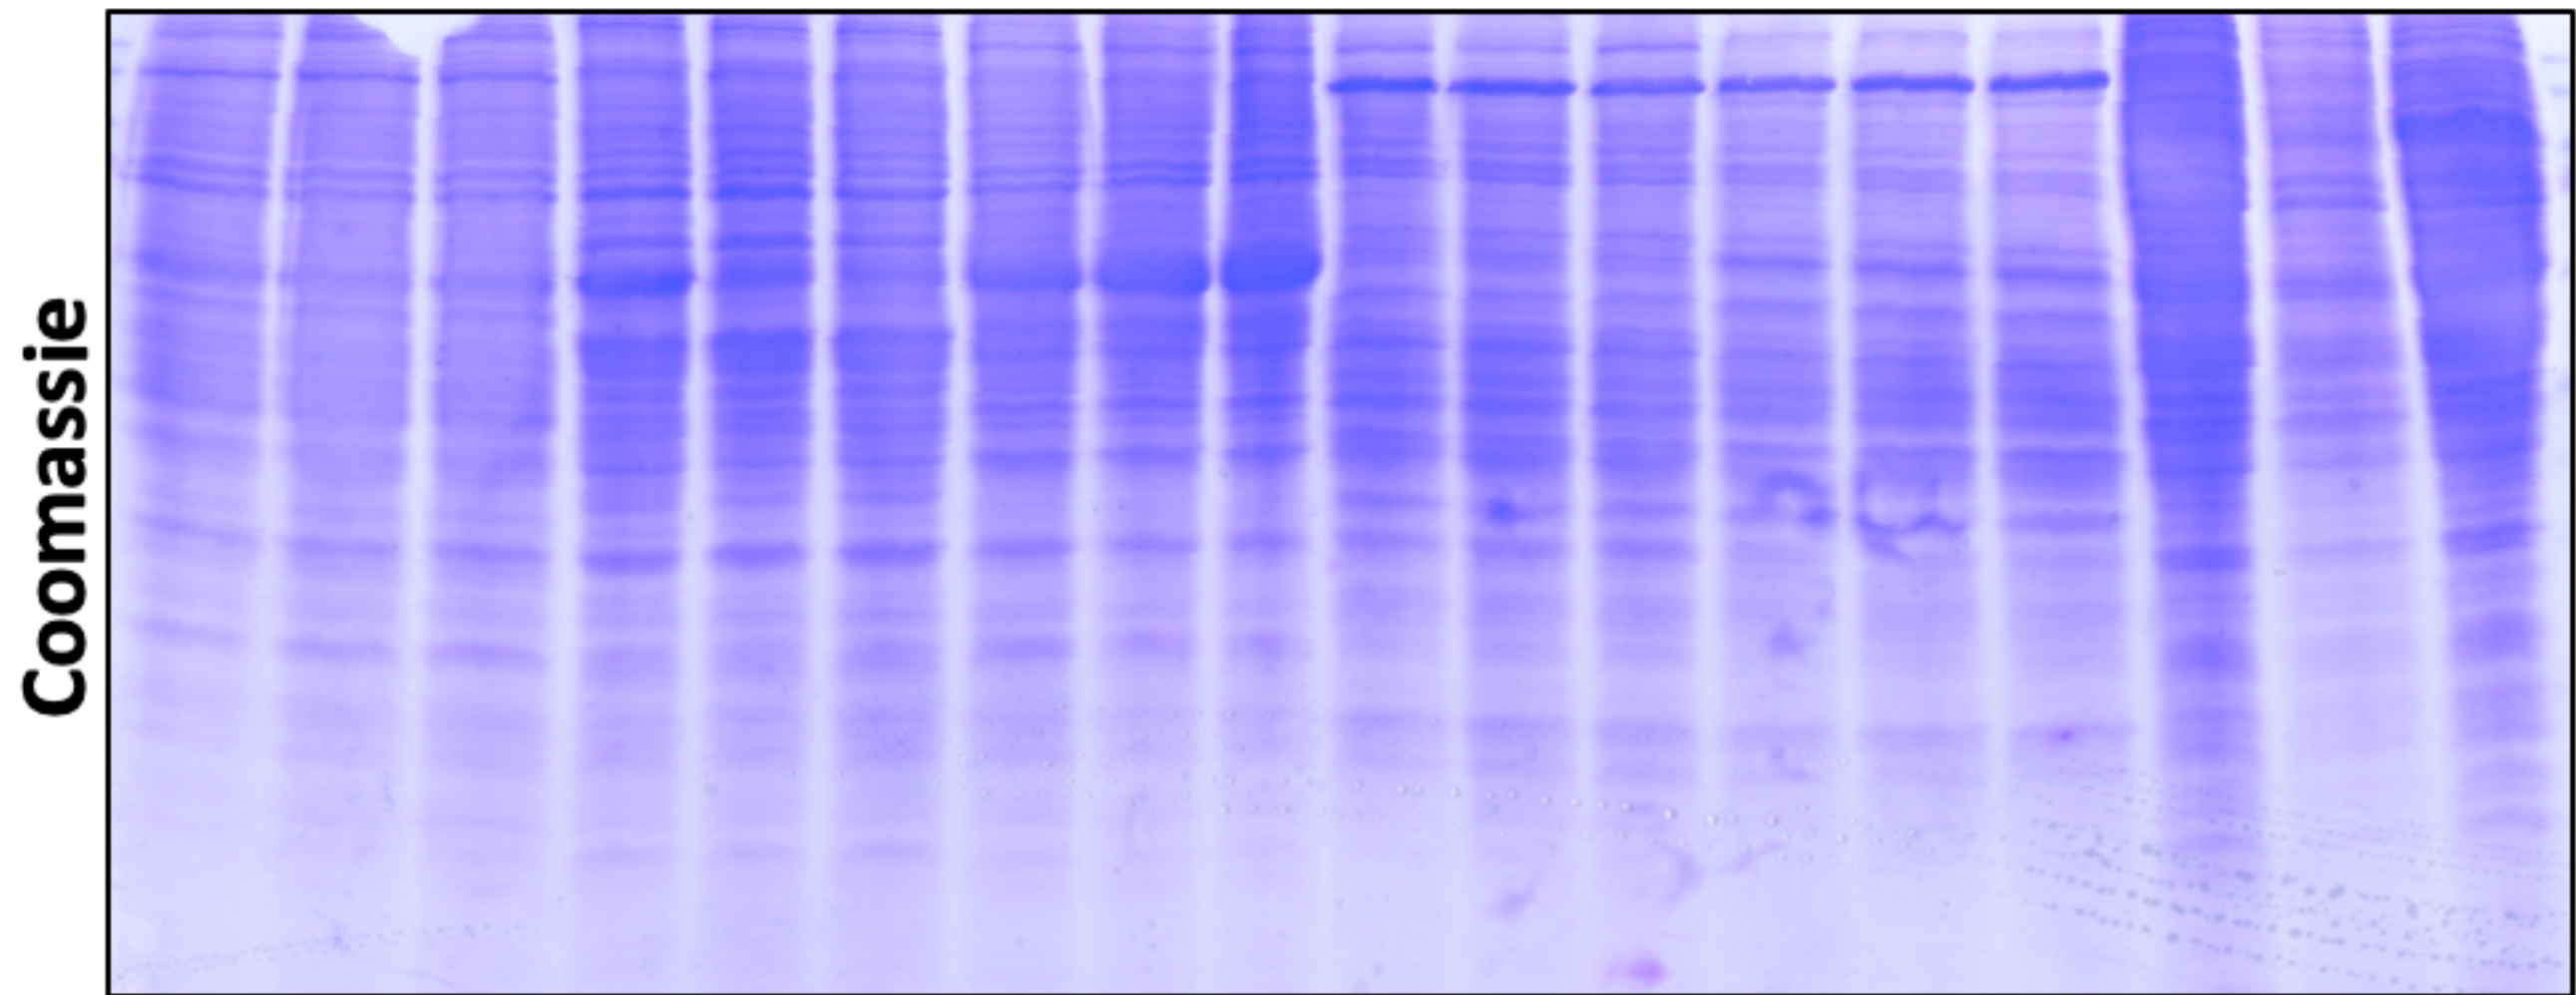

Supplement: SupplementFig1.pdf [file SupplementFig1.pdf]
